# Supplementary material for: The fabrication of a novel polyacrylonitrile/reduced graphene oxide-amino-halloysite/bimetallic metal–organic framework electrospun nanofiber adsorbent for the ultrasonic-assisted thin-film microextraction of fatty acid methyl esters in dairy products with gas chromatography-flame ionization detection
Source: Royal Society of Chemistry journal article supplement (doi:10.1039/d0ra07674k), 2021-01-01
Supplement: d0ra07674k1.pdf [file d0ra07674k1.pdf]

## Supplementary Materials

The fabrication of a novel polyacrylonitrile/reduced graphene oxide-amino-halloysite/bimetallic metal–organic framework electrospun nanofiber adsorbent for the ultrasonic-assisted thin-film microextraction of fatty acid methyl esters in dairy products with gas chromatography-flame ionization detection

**R. Mirzajani<sup>a\*</sup>, F. Kardani<sup>a</sup>, Z. Ramezani<sup>b</sup>**

*<sup>a</sup>Chemistry Department, College of Science, Shahid Chamran University of Ahvaz, Ahvaz, Iran*

*<sup>b</sup>Faculty of Pharmacy, Ahvaz Jundishapur University of Medical Sciences, Ahvaz, Iran*

*E-mail address: rmirzajani@scu.ac.ir (R. Mirzajani) Tel. / Fax +986133738044*

### Figures of contents in Supporting Information:

Fig 1S. EDS spectera of (a) HNT (b) rGO-amino-HNT/ (Co<sub>0.5</sub> Zn<sub>0.5</sub> (Melm)<sub>2</sub>) nanocomposite.

Fig 2S. X-ray diffraction patterns of (a) reduced graphene oxide (b) bimetallic ZIFs (Co<sub>x</sub>-Zn<sub>1-x</sub>)(Melm)<sub>2</sub> metal-organic framework (c) rGO-amino-HNT/ (Co<sub>0.5</sub> Zn<sub>0.5</sub> (Melm)<sub>2</sub>) nanocomposite.

Fig 3S. Desirability ramp for the numerical optimization of three goals, namely the pH, NaCl (%w/v), and Extraction time (min).

Fig. 4S Chromatograms of (a) standard solution of fatty acids methyl esters in n-hexane and unspiked, (b) milk, (c) yogurt and (d) yogurt soda.

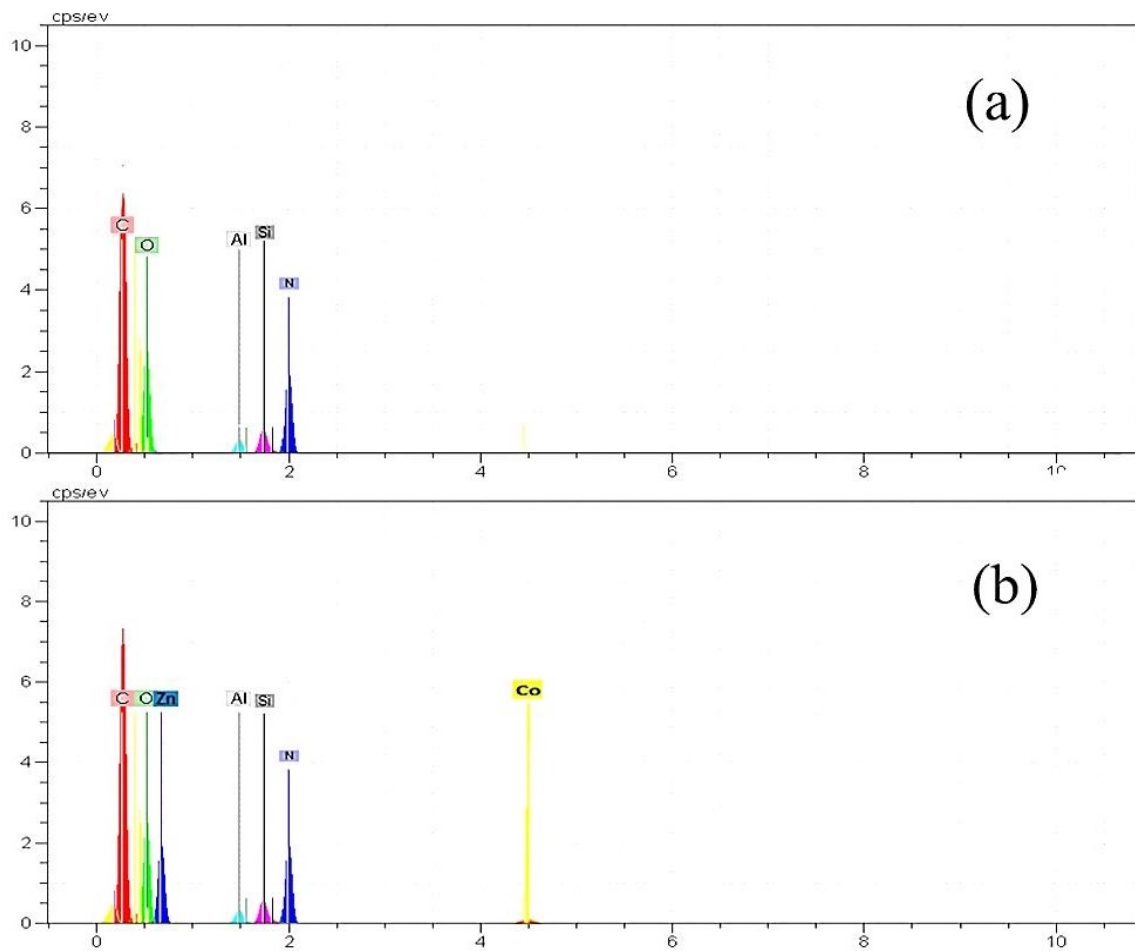

**Fig. 1S** EDS spectra of (a), HNT (b) rGO-amino-HNT/  $(\text{Co}_{0.5}\text{Zn}_{0.5}(\text{MeIm})_2)$  nanocomposite

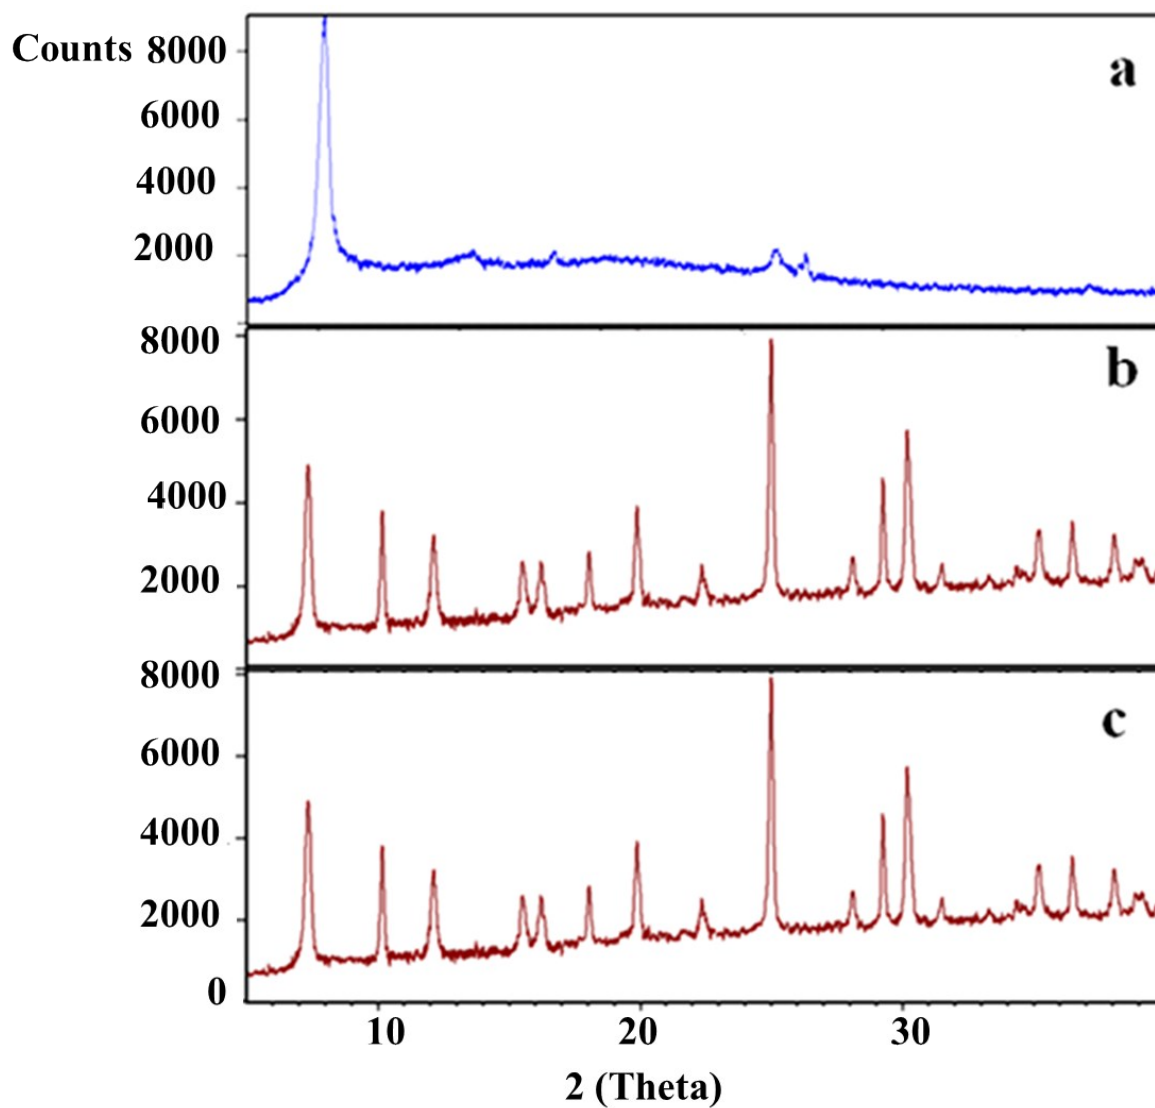

Fig .2S X-ray diffraction patterns of (a) reduced graphene oxide (b) bimetallic ZIFs ( $\text{Co}_x\text{Zn}_{1-x}(\text{Melm})_2$ ) metal-organic framework (c) rGO-amino-HNT/ ( $\text{Co}_{0.5}\text{Zn}_{0.5}(\text{Melm})_2$ ) nanocomposite

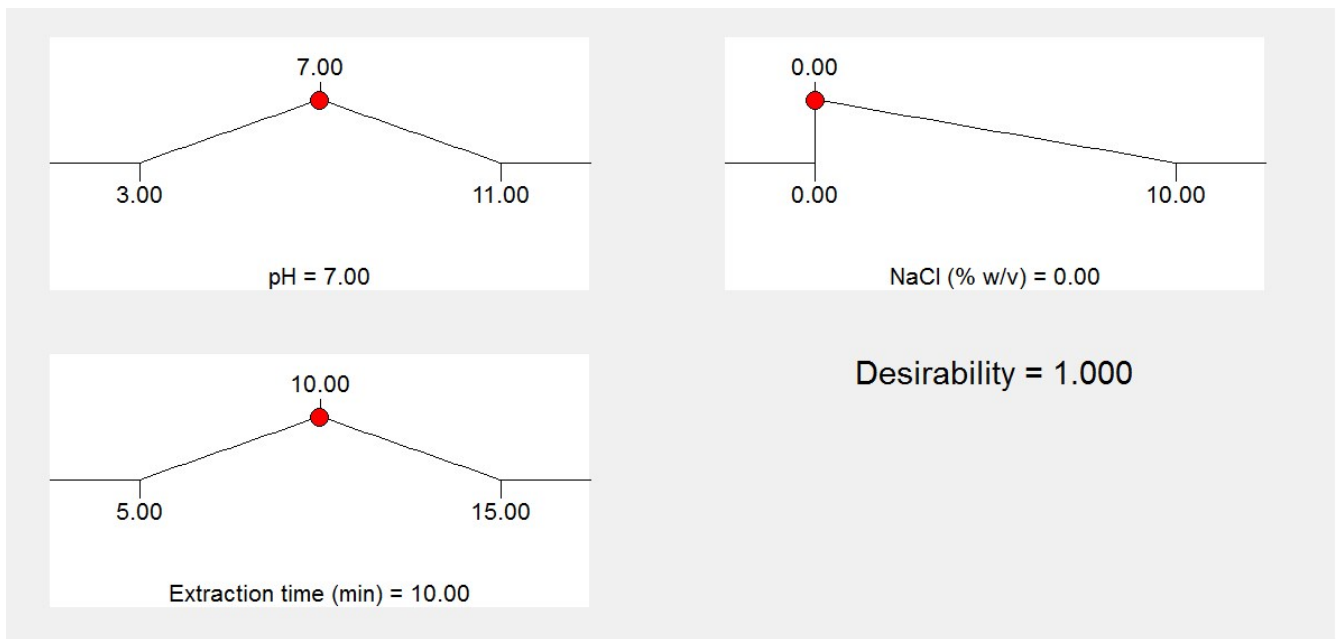

**Fig. 35** Desirability ramp for the numerical optimization of three goals, namely the pH, NaCl (%w/v) and Extraction time (min)

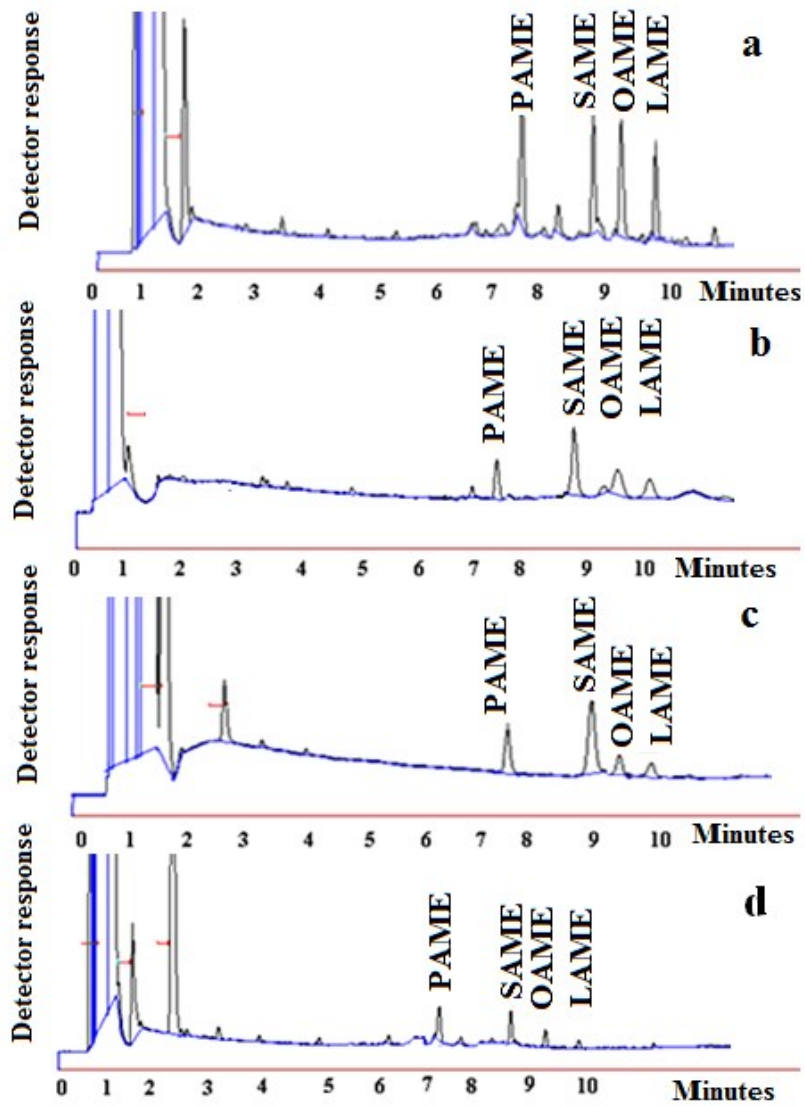

**Fig. 4S** Chromatograms of (a) standard solution of fatty acids methyl esters in n-hexane and unspiked: (b) milk, (c) yogurt and (d) yogurt soda.

**Table S1** The amount of detected of FAME in dairy products using the proposed TFME-GC-FID method

| Sample      | Concentration (mg kg <sup>-1</sup> ) |       |       |              |
|-------------|--------------------------------------|-------|-------|--------------|
|             | PAME                                 | SAME  | OAME  | LAME         |
| Milk        | 47.35                                | 55.76 | 28.48 | <b>19.52</b> |
| Yogurt      | 42.62                                | 51.48 | 18.36 | <b>9.56</b>  |
| Cheese      | 38.63                                | 43.58 | 16.85 | <b>11.85</b> |
| Yogurt soda | 17.59                                | 22.61 | 8.47  | <b>7.75</b>  |
| Butter      | 63.58                                | 68.43 | 25.85 | <b>22.57</b> |
